# Supplementary material for: Non-Invasive Pneumococcal Pneumonia in Portugal—Serotype Distribution and Antimicrobial Resistance
Source: PubMed Central journal article supplement (PMC4116175; doi:10.1371/journal.pone.0103092), 2014-07-30
Supplement: pone.0103092.s001.pdf [file pone.0103092.s001.pdf]

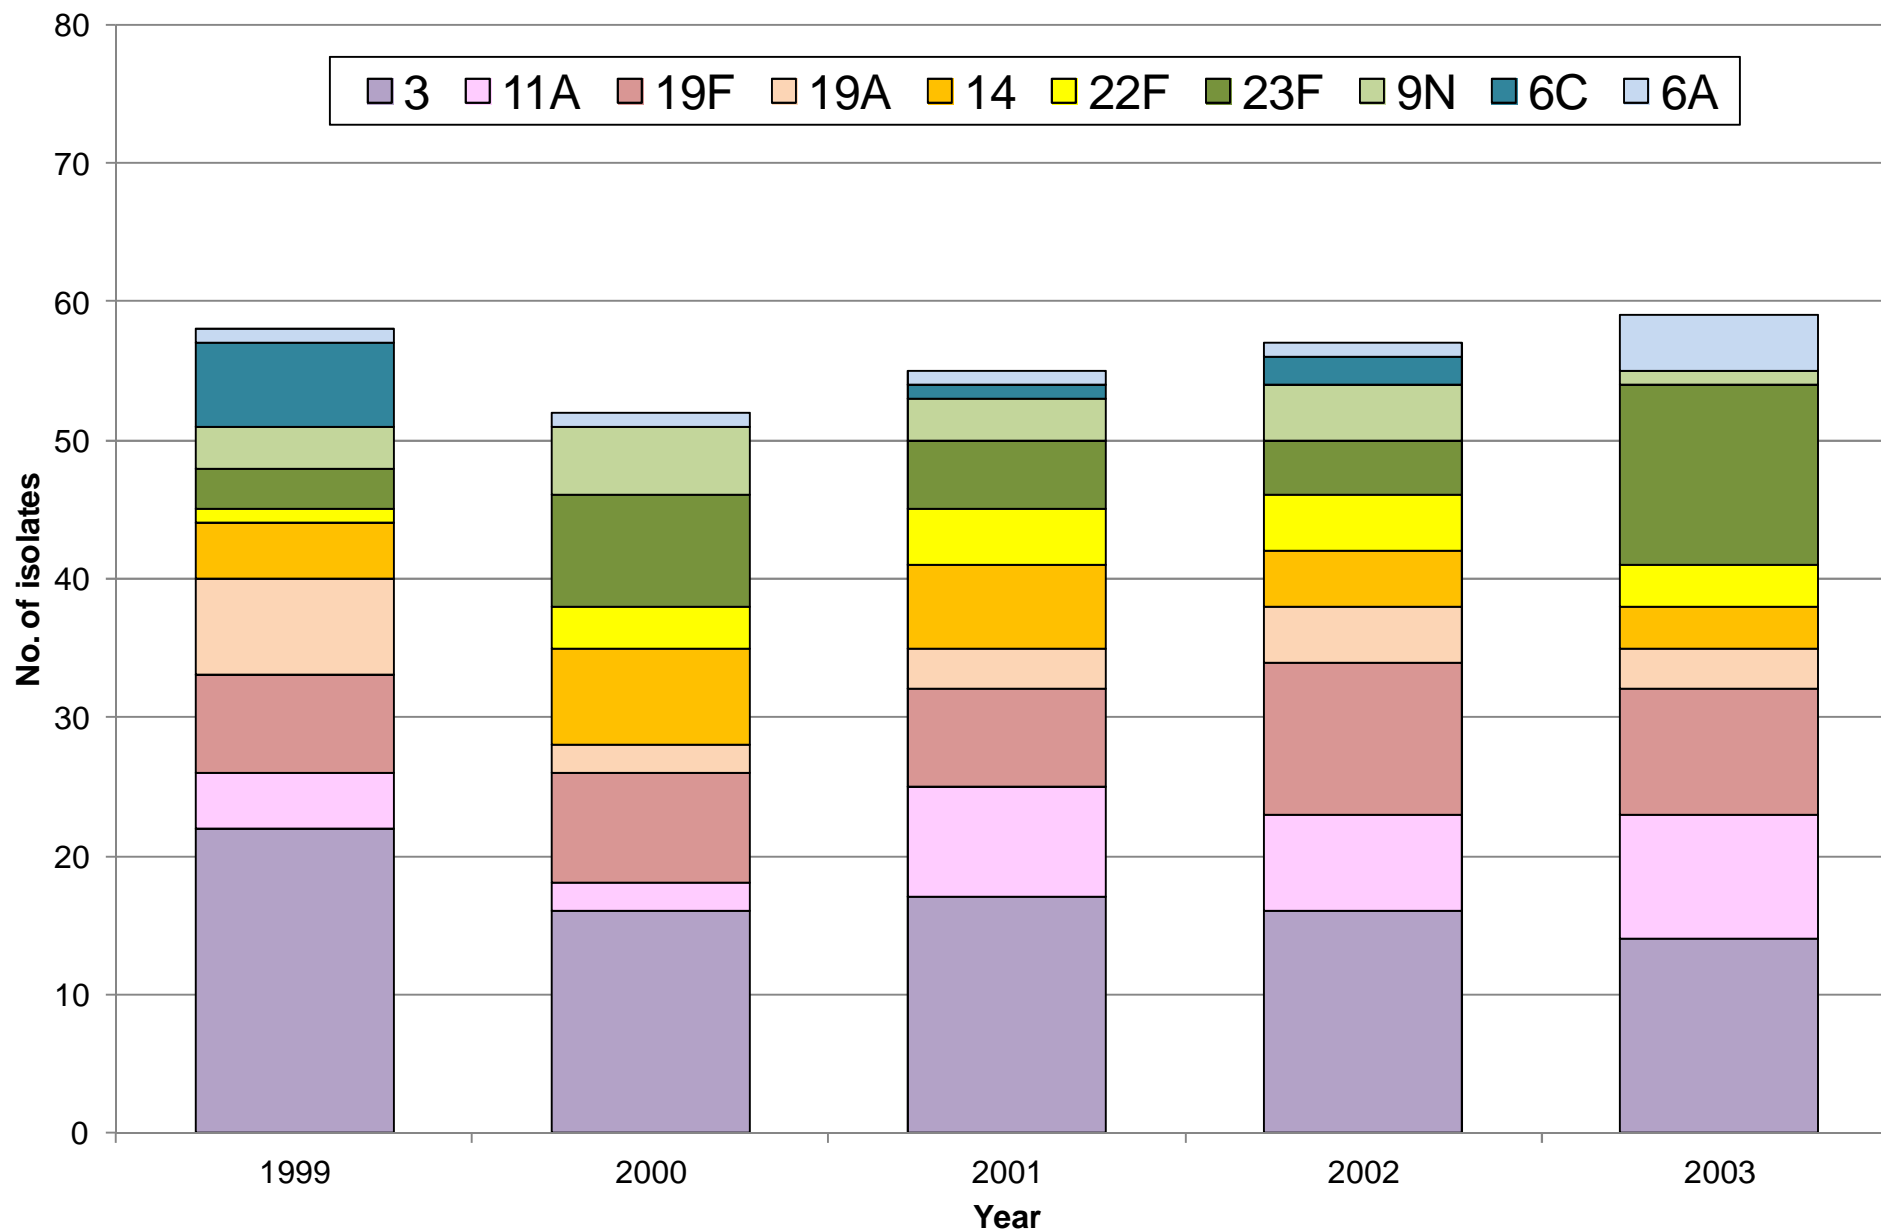

**Figure S1 – Serotype distribution of the isolates causing non-invasive pneumococcal pneumonia in adults in Portugal (1999-2003).** Only the overall 10 most frequent serotypes are shown.
