# Supplementary material for: Non-Invasive Pneumococcal Pneumonia in Portugal—Serotype Distribution and Antimicrobial Resistance
Source: PubMed Central journal article supplement (PMC4116175; doi:10.1371/journal.pone.0103092), 2014-07-30
Supplement: pone.0103092.s003.pdf [file pone.0103092.s003.pdf]

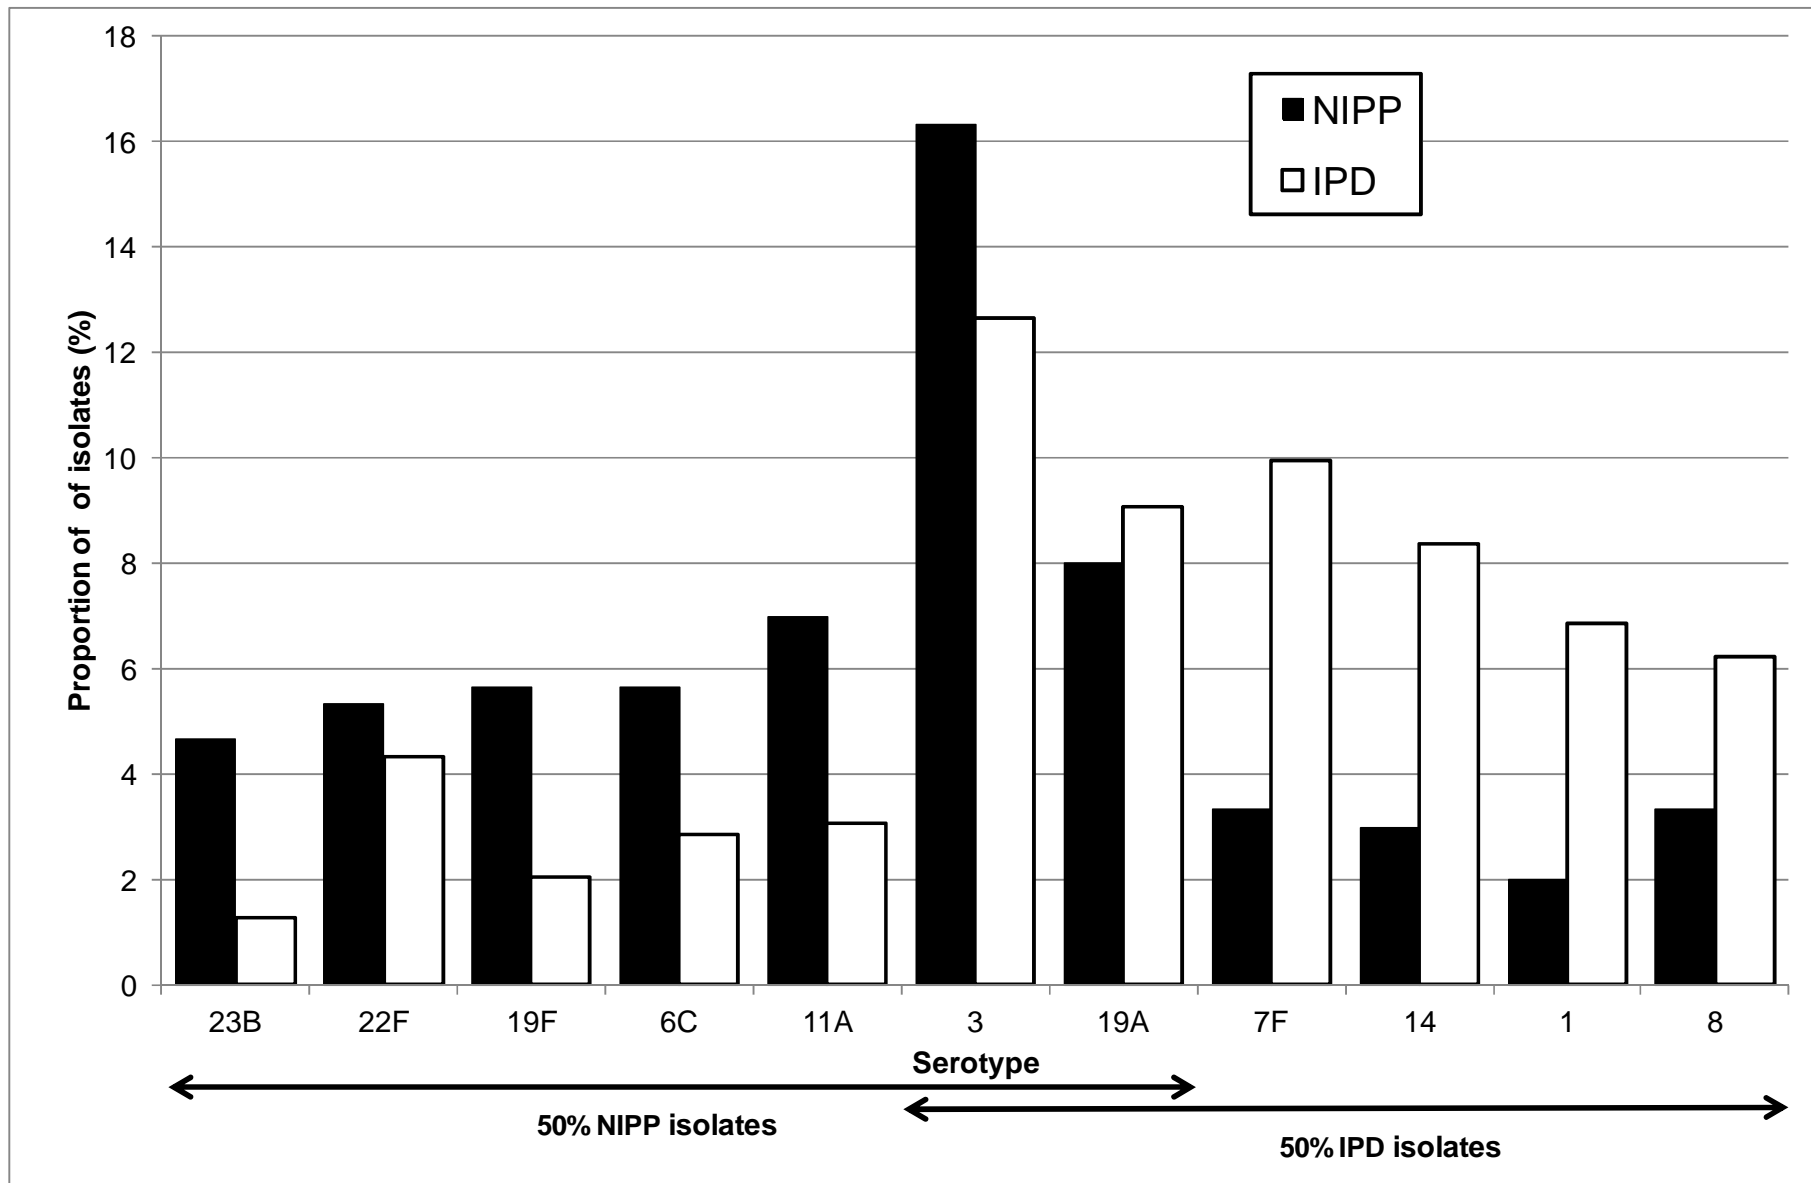

**Figure S3 – Proportion of isolates of each of the serotypes that together were responsible for half of non-invasive pneumococcal pneumonia isolates and half of invasive pneumococcal disease cases in adults in Portugal (2009-2011). Data from IPD were published previously (19).**
