# Supplementary material for: Non-Invasive Pneumococcal Pneumonia in Portugal—Serotype Distribution and Antimicrobial Resistance
Source: PubMed Central journal article supplement (PMC4116175; doi:10.1371/journal.pone.0103092), 2014-07-30
Supplement: pone.0103092.s004.pdf [file pone.0103092.s004.pdf]

**Table S1: Serotype distribution of the 10 most common serotypes responsible for non-invasive pneumococcal pneumonia in adults in Portugal, stratified by age groups (1999-2011)**

|       | No. isolates (%)       |                        |                    |
|-------|------------------------|------------------------|--------------------|
|       | [18-49] yrs<br>(n=481) | [50-64] yrs<br>(n=293) | ≥65 yrs<br>(n=526) |
| 3     | 67 (13.9)              | 63 (21.5)              | 101 (19.2)         |
| 11A   | 29 (6.0)               | 16 (5.5)               | 42 (8.0)           |
| 19F   | 36 (7.5)               | 16 (5.5)               | 35 (6.7)           |
| 19A   | 25 (5.2)               | 15 (5.1)               | 28 (5.3)           |
| 14    | 20 (4.2)               | 13 (4.4)               | 20 (3.8)           |
| 22F   | 18 (3.7)               | 9 (3.1)                | 26 (4.9)           |
| 23F   | 17 (3.5)               | 10 (3.4)               | 23 (4.4)           |
| 9N    | 21 (4.4)               | 6 (2.0)                | 19 (3.6)           |
| 6C    | 16 (3.3)               | 8 (2.7)                | 13 (2.5)           |
| 6A    | 10 (2.1)               | 10 (3.4)               | 15 (2.9)           |
| Other | 222 (46.2)             | 127 (43.3)             | 204 (38.8)         |
