# Supplementary material for: Non-Invasive Pneumococcal Pneumonia in Portugal—Serotype Distribution and Antimicrobial Resistance
Source: PubMed Central journal article supplement (PMC4116175; doi:10.1371/journal.pone.0103092), 2014-07-30
Supplement: pone.0103092.s005.pdf [file pone.0103092.s005.pdf]

**Table S2. Isolates expressing vaccine serotypes responsible for non-invasive pneumococcal pneumonia in adults in Portugal, stratified by age groups (2009-2011)**

|       | No. isolates (%) |             |           |
|-------|------------------|-------------|-----------|
|       | [18-49] yrs      | [50-64] yrs | ≥65 yrs   |
| PCV7  | 9 (12.0)         | 10 (12.2)   | 12 (8.4)  |
| PCV13 | 34 (45.3)        | 39 (47.6)   | 58 (40.6) |
| PPV23 | 45 (60.0)        | 57 (69.5)   | 96 (67.1) |
