# Supplementary material for: Non-Invasive Pneumococcal Pneumonia in Portugal—Serotype Distribution and Antimicrobial Resistance
Source: PubMed Central journal article supplement (PMC4116175; doi:10.1371/journal.pone.0103092), 2014-07-30
Supplement: pone.0103092.s006.pdf [file pone.0103092.s006.pdf]

**Table S3. Serotype distribution of the 10 overall most common serotypes in NIPP and in IPD (2009-2011).**

| NIPP       |           |                  | IPD*      |            |                  |
|------------|-----------|------------------|-----------|------------|------------------|
| Serotype†  | n (%)     | Cumulative n (%) | Serotype† | n (%)      | Cumulative n (%) |
| 3          | 49 (16.3) | 49 (16.3)        | 3         | 160 (12.6) | 160 (12.6)       |
| 19A        | 24 (8.0)  | 73 (24.3)        | <b>7F</b> | 126 (10.0) | 286 (22.6)       |
| <b>11A</b> | 21 (7.0)  | 94 (31.3)        | 19A       | 115 (9.1)  | 401 (31.7)       |
| 6C         | 17 (5.7)  | 111 (37.0)       | <b>14</b> | 106 (8.4)  | 507 (40.1)       |
| 19F        | 17 (5.7)  | 128 (42.7)       | 1         | 87 (6.9)   | 594 (47.0)       |
| 22F        | 16 (5.3)  | 144 (48.0)       | 8         | 79 (6.2)   | 673 (53.2)       |
| <b>23B</b> | 14 (4.7)  | 158 (52.7)       | 22F       | 55 (4.3)   | 728 (57.5)       |
| 9N         | 12 (4.0)  | 170 (56.7)       | <b>4</b>  | 43 (3.4)   | 771 (60.9)       |
| 7F         | 10 (3.3)  | 180 (60.0)       | 11A       | 39 (3.1)   | 810 (64.0)       |
| 8          | 10 (3.3)  | 190 (63.3)       | 6C        | 36 (2.8)   | 846 (66.0)       |

\* Information published previously (19)

†Serotypes in bold were associated with NIPP or IPD (P<0.05)
